# Supplementary material for: Mechanisms of expression and translocation of major fission yeast glucose transporters regulated by CaMKK/phosphatases, nuclear shuttling, and TOR
Source: PubMed Central journal article supplement — Mol Biol Cell. 2015 Jan 15;26(2):373–86. doi: 10.1091/mbc.E14-11-1503 (PMC4294683; doi:10.1091/mbc.e14-11-1503), 2015-01-15
Supplement: supp_E14-11-1503v1_CombinedSupMats.pdf [file supp_E14-11-1503v1_CombinedSupMats.pdf]

# Supplemental Materials

*Molecular Biology of the Cell*

Saitoh et al.

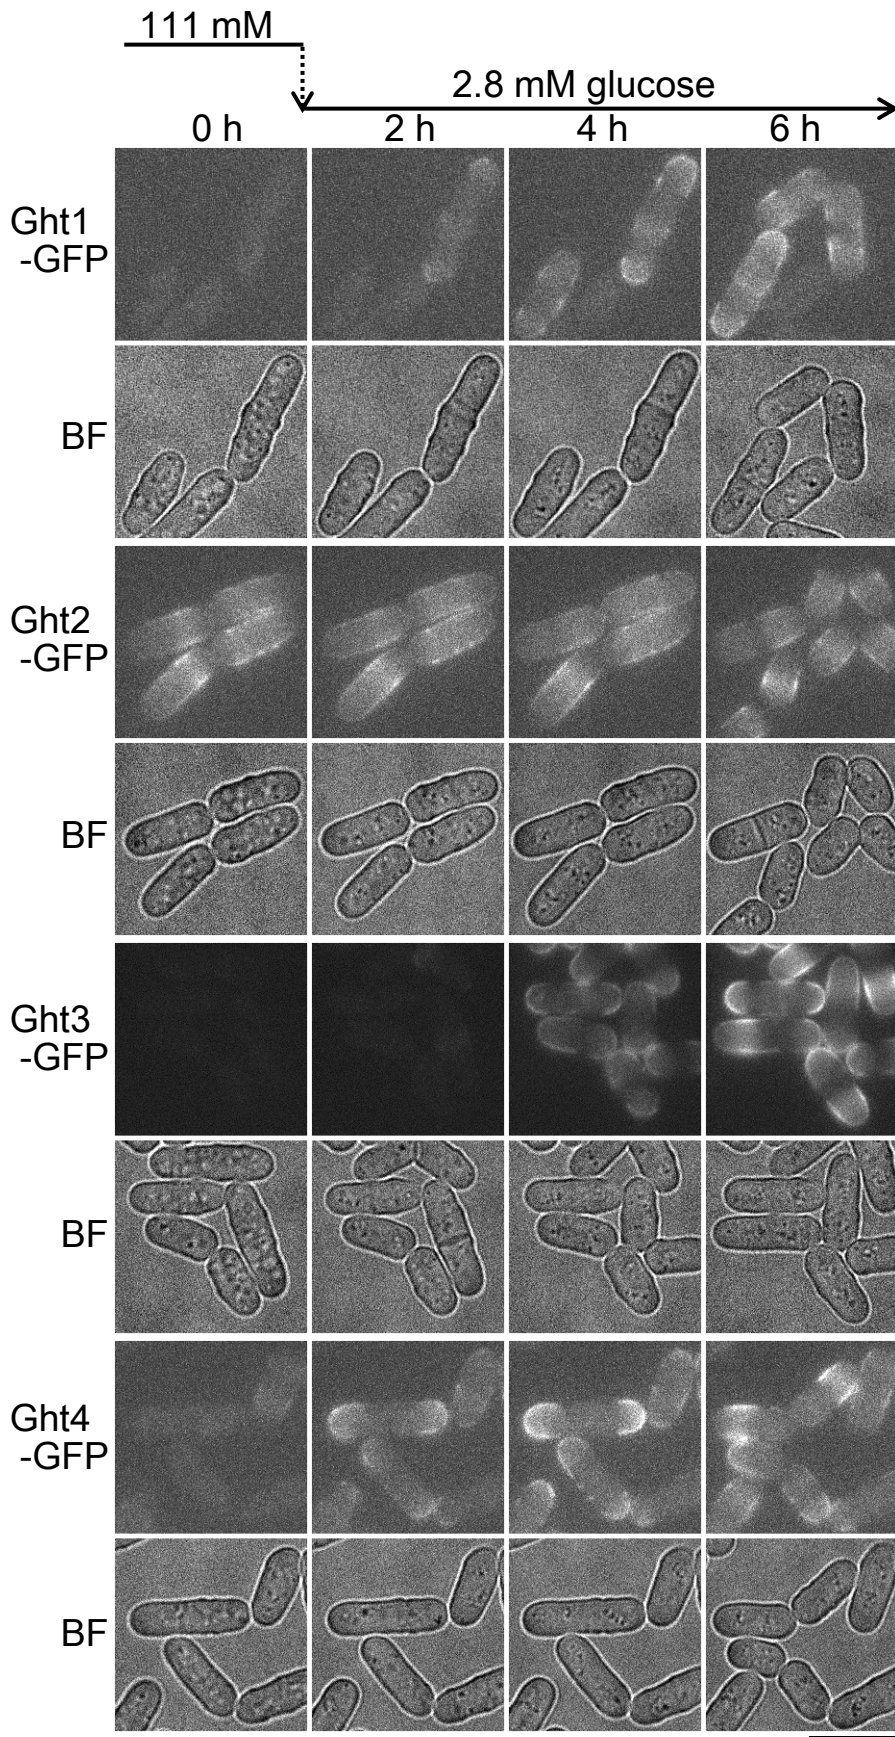

**A**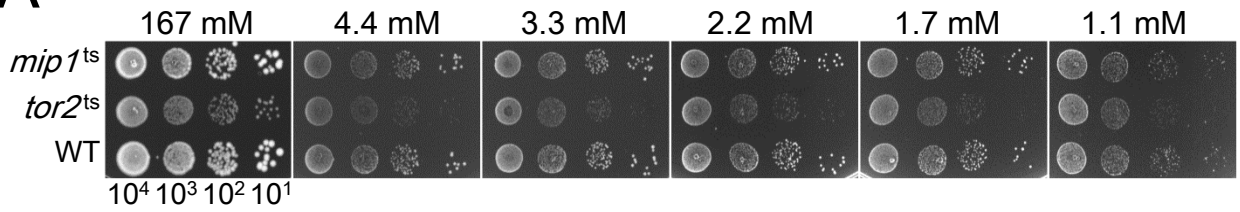**B**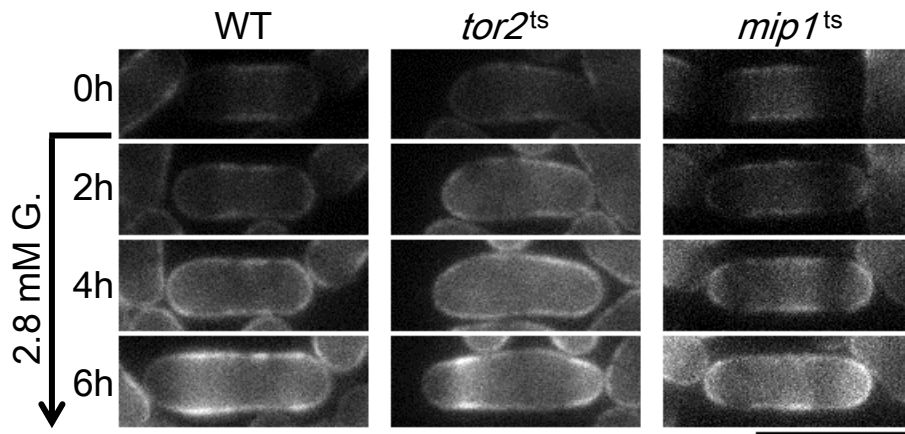

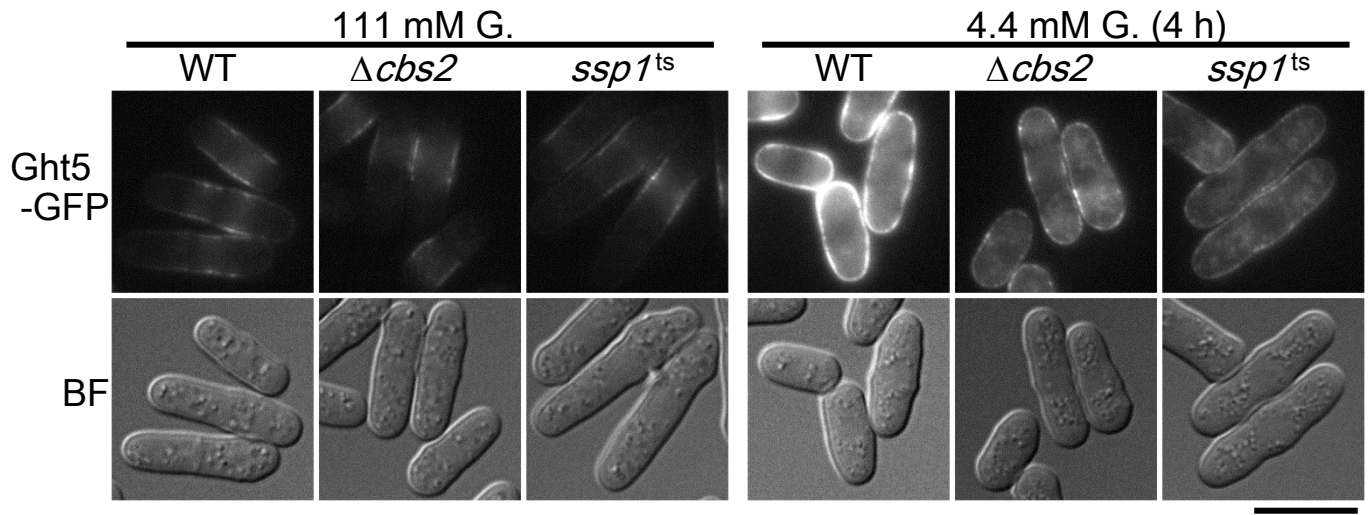

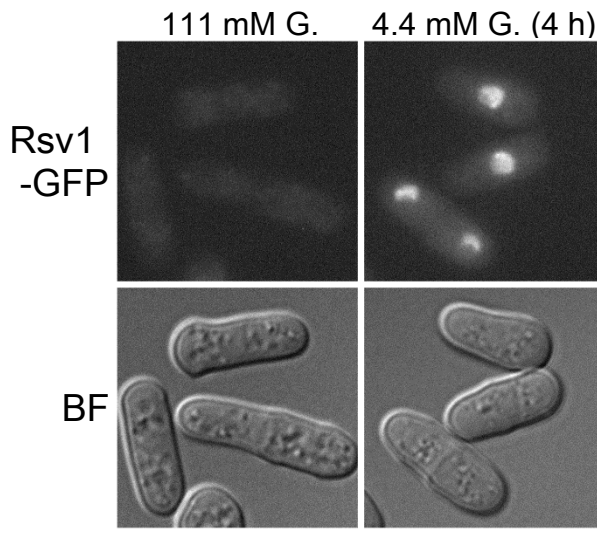

### **Supplemental Figure legends**

Supplemental Figure S1 (related to Figure 2). **Time-lapse images of GFP-fused Ght transporters.**

Cells harboring the indicated GFP-tagged *ght*<sup>+</sup> gene were cultivated at 26°C in a microfluidic perfusion chamber with a continuous supply of medium, and the glucose concentration was switched from 111 mM to 2.8 mM at time 0. GFP fluorescence and brightfield (BF) microscopy images at 2 h-intervals are shown. Fluorescent signals of Ght6-GFP and Ght7-GFP were too low to be detected. Bar, 10 μm.

Supplemental Figure S2 (related to Figure 5). **TORC1 is not essential for cell proliferation in low glucose.**

(A) Aliquots of 10<sup>4</sup> cells of *mip1-310*, *tor2-L2048S*, and the WT strains were diluted serially 10-fold, spotted onto YES medium plates containing the indicated concentrations of glucose, and incubated at 30°C for 3 d. (B) Time-lapse images of Ght5 localization in the WT and TORC1-related mutant cells. WT and indicated mutant cells harboring Ght5-GFP were cultivated at semi-permissive temperatures (30°C for *tor2* and 33°C for others) in a microfluidic perfusion chamber with continuous supply of medium, and the glucose concentration was switched from 111 mM to 2.8 mM at time 0 h. GFP fluorescent images at 2-h intervals are shown. Bar, 10 μm.

Supplemental Figure S3 (related to Figure 6). **Cbs2, the γ-subunit of AMPK, is required for elevated expression of Ght5 under low-glucose conditions.**

Micrographs of WT,  $\Delta$ *cbs2* and the *spp1-837* cells expressing Ght5-GFP under the native promoter. After 4-h cultivation in EMM2 medium containing 111 mM or 4.4 mM

glucose at 33°C, cells were harvested by centrifugation and resuspended in a small amount of the same medium. Ght5-GFP fluorescence and brightfield (BF) microscopy images showing cell shape were obtained immediately without fixation. The fluorescence images in this panel were processed under the same conditions. Bar, 10  $\mu\text{m}$ .

Supplemental Figure S4 (related to Figure 7). **Intracellular localization of Rsv1-GFP in WT cells.**

Cells expressing Rsv1-GFP were transferred from EMM2 medium with 111 mM glucose to EMM2 medium with either 111 mM or 4.4 mM glucose, and cultivated for 4 h before sampling. Rsv1-GFP fluorescence and brightfield microscopy images were obtained immediately without fixation. Bar, 10  $\mu\text{m}$ .
